# Supplementary material for: The effect of neoadjuvant chemoradiation therapy in resectable pancreatic cancer was independent of intratumoral vascularization
Source: Research Square preprint supplement (doi:10.21203/rs.3.rs-5140786/v1), 2025-04-02
Supplement: Supplementary file 1 [file 2772e9f47c3d6c3103834ea6.xlsx]

## Sheet: S-Table 2
Supplementary Table 2 Univariate and multivariate analyses on overall survival
Charasteristics		Univariate analysis				Multivariate analysis
		Hazard ratio (95% Cl)		p-value		Hazard ratio (95% Cl)		p-value
Sex
	Female / Male	0.9876	(0.45-2.18)	0.9753
Age, years
	<65 / 65≤	1.412	(0.63-3.14)	0.3988
Tumor location
	Head / Body, Tale	0.5774	(0.26-1.29)	0.1789
Tumor size before preoperative CRTc [mm]
	<20 / 20≤	2.484	(1.06-5.81)	0.03588		2.53	(1.08-5.96)	0.03358
CA19-9 [IU/mL]
	<37 / 37≤	1.917	(0.80-4.60)	0.1446
CEA [ng/mL]
	<5.0 / 5.0≤	2.249	(0.84-6.03)	0.1075
PVspa
	- / +	2.364	(1.05-5.32)	0.03752		2.475	(1.08-5.67)	0.03215
PAspb
	- / +	2.786	(1.22-6.36)	0.01499		3.553	(1.46-8.68)	0.0054
Initial chemotherapy
	Gemcitabine or S-1 / Gemcitabine + nab-paclitaxel	1.001	(0.24-4.25)	0.9988
Adjuvant therapy completion
	complete / imcomplete	1.192	(0.54-2.63)	0.6636
aPVsp invasion to splenic vein, bPAsp invasion to splenic artery
