# Supplementary material for: The effect of neoadjuvant chemoradiation therapy in resectable pancreatic cancer was independent of intratumoral vascularization
Source: Research Square preprint supplement (doi:10.21203/rs.3.rs-5140786/v1), 2025-04-02
Supplement: Supplementary file 3 [file 84587d999ac3381b8ad7d025.xlsx]

## Sheet: S-Table 1
Supplementary Table 1 Univariate and multivariate analyses on recurrence-free survival
Charasteristics		Univariate analysis				Multivariate analysis
		Hazard ratio (95% Cl)		p-value		Hazard ratio (95% Cl)		p-value
Sex
	Female / Male	1.067	(0.48-2.38)	0.875
Age, years
	<65 / 65≤	1.095	(0.49-2.45)	0.8254
Tumor location
	Head / Body, Tale	0.6783	(0.31-1.48)	0.3311
Tumor size before preoperative CRTc [mm]
	<20 / 20≤	2.782	(1.14-6.79)	0.02452		2.811	(1.15-6.88)	0.02353
CA19-9 [IU/mL]
	<37 / 37≤	1.933	(0.80-4.68)	0.1437
CEA [ng/mL]
	<5.0 / 5.0≤	1.81	(0.61-5.34)	0.2822
PVspa
	- / +	2.173	(0.96-4.93)	0.06298
PAspb
	- / +	2.573	(1.13-5.86)	0.02449		3.09	(1.27-7.54)	0.01314
Initial chemotherapy
	Gemcitabine or S-1 / Gemcitabine + nab-paclitaxel	1.074	(0.25-4.57)	0.9232
Adjuvant therapy completion
	complete / imcomplete	1.104	(0.49-2.47)	0.8091
aPVsp invasion to splenic vein, bPAsp invasion to splenic artery
